1  
2  
3  
4  
5  
6  
7  
8  
9  
10  
11  
12  
13  
14  
15  
16  
17  
18  
19  
20  
21

**Adherence to Anti-Epileptic Drugs and Self-reported Availability  
and Affordability of the Drugs in Addis Ababa, Ethiopia.**

**Adherence to Anti-Epileptic Drugs and Self-reported Availability  
and Affordability of the Drugs**

*Bethlehem Shawel<sup>1</sup> Yemane Berhane<sup>2</sup>*

*1 Reproductive Health and Population Department, Addis Continental*

*Institute of Public Health, Addis Ababa, Ethiopia*

*2 Epidemiology and Biostatistics Department, Addis Continental Institute*

*of Public Health, Addis Ababa, Ethiopia*

\* Corresponding author

Email: [bethlehem.shawel@gmail.com](mailto:bethlehem.shawel@gmail.com) (BS)

## 22 **Abstract**

23 **Background:** Anti-epileptic drugs (AEDs) are the primary therapeutic mode to control seizures  
24 in patients with epilepsy. Adherence to the medications is critical to achieving the goals of epilepsy  
25 therapy. However, the cost of the drugs and interrupted availability of AEDs contribute to non-  
26 adherence to epilepsy treatment. Therefore, this study aimed to assess AED adherence and its  
27 association with self-reported drug availability and affordability.

28 **Objective:** To assess whether self-reported availability and affordability of Antiepileptic drugs  
29 affect drug adherence among Epileptic Patients at Eka Kotebe General Hospital, Addis Ababa,  
30 Ethiopia, from January 2023 to March 2023.

31 **Methods:** A hospital-based analytical cross-sectional study was conducted among 357 epileptic  
32 patients using the Consecutive sampling method in Eka Kotebe General Hospital, Addis Ababa,  
33 Ethiopia. AED adherence was measured using a self-report 3items questionnaire focusing on  
34 medication use patterns of patients from their last visit to the current visit. Statistical packages for  
35 Social Sciences 26.0 version statistical software cleaned, coded and analyzed the collected data.  
36 Binary logistic regression was fitted, and P-values less than 0.05 were considered to have statistical  
37 significance.

38 **Result:** The prevalence of AED adherence was 55.2% with 95% CI (50.1%; 60.2%). About two-  
39 thirds (61.3%) of patients in this study had limited access to the AEDs or could not afford the  
40 medications. Self-reported availability of AEDs (AOR=2.04, 95% CI=1.03, 4.03) was  
41 significantly associated with AED adherence. Self-reported affordability of AEDs was associated  
42 with AED adherence (COR=1.59, CI=1.04, 2.42, P-Value=0.031) in the Bivariate logistic  
43 regression analysis; however, when adjusted for other covariates in the multivariable logistic  
44 regression, no significant association was observed (p=0.730).

45 **Conclusion and Recommendation:** Only about half of the epileptic patients adhered to AEDs at  
46 Eka Kotebe General Hospital. Self-reported availability of AEDs was an essential factor.  
47 Improving access to AEDs is critical to improving adherence and management of epilepsy.

## 48 **Introduction**

49 Medication adherence is the extent to which individuals take their medications as prescribed with  
50 respect to dosage and dosage intervals (1). In both developed and developing countries, non-  
51 adherence to medication remains a significant concern for healthcare providers as well as patients  
52 because of its adverse consequences on therapeutic outcomes. It is significant, especially in chronic  
53 illnesses involving complex and long-term medical regimens (2).

54 Epilepsy is a common chronic neurological disease of the brain affecting 50 million people  
55 worldwide, of whom 40 million are estimated to live in developing countries (3). Antiepileptic  
56 Drugs (AEDs) are the mainstay of long-term epilepsy treatment, and they are 70% effective at  
57 reducing epileptic attacks in adults (4). However, about 90% of epileptic patients in developing  
58 countries are not receiving appropriate treatment due to cultural attitudes, lack of prioritization,  
59 poor healthcare system, and inadequate supply of antiepileptic drugs (AEDs) (5).

60 In Ethiopia, epilepsy is often mistakenly seen as a form of mental illness by the Community and  
61 is usually treated by psychiatrists and psychiatric nurses. The most prescribed Antiepileptic drugs  
62 are phenobarbitone, phenytoin, and sometimes carbamazepine and sodium Valproate.

63 A study in Western countries revealed an adherence rate of 71% in the US (6) and 59% in the UK  
64 (7). The result was not different in Gondar, Ethiopia (70.8%) (8) and Jimma, Ethiopia (58.5%)  
65 (9). On the other hand, the report was higher in India (98.6%) (10) and Palestine (85.3%) (11).  
66 However, a lower adherence rate was found in China 51.9% (12), Nigeria (32.6%) (13), and South  
67 Africa (54.6%) (14).

68 The consequence of AED nonadherence behavior has been associated with poor seizure control,  
69 increased morbidity and mortality along with increased time of hospitalization, worsened patient  
70 outcome, poor quality of life, and increased healthcare cost. AED nonadherence will also lead to  
71 an increase in the burden of inpatient and emergency department services; moreover, it also affects  
72 the family members socially, economically, and psychologically (15).

73 Availability and affordability of AEDs are poor and act as a barrier to accessing treatment for  
74 epilepsy in low and middle-income countries (16). In most low-income countries, access to  
75 medicines remains very low. The availability and affordability of drugs are two key factors that  
76 affect patients' access to treatment. A study of the availability and prices of AEDs in southern  
77 Vietnam showed that only 57% of the public and private pharmacies surveyed had AEDs available  
78 (17). A second study conducted in Zambia found that nearly one-half of the government, private,  
79 and nongovernmental organization (NGO) pharmacies surveyed did not carry AEDs (18). There  
80 is a failure to explore these factors, particularly in Ethiopia.

81 A study done in Bangui, Central African Republic, on the Problem of accessibility to anti-seizure  
82 drugs for patients who have epilepsy, shows that the lack of trained personnel, the inadequacy of  
83 pharmaceutical structures, the insufficient availability of antiepileptic drugs, and their very high  
84 cost are factors limiting the accessibility of antiepileptic medications for epileptic patients (19).

85 This study aimed to evaluate drug availability and affordability from the patient's point of view.  
86 This allows for a more direct assessment of the role of these factors in adherence. However, the  
87 studies and tools developed thus far were from a system perspective. Hence, this study aims to  
88 assess the association of self-reported drug availability and affordability with drug adherence. In  
89 addition, AED adherence was also assessed to fill the gaps in epilepsy treatment.

90

## 91 **Methodology**

### 92 **Study design and period**

93 A hospital-based Analytical cross-sectional study with internal comparison was conducted from  
94 January 2023 to March 2023.

### 95 **Study Setting**

96 The study was conducted at Eka Kotebe General Hospital, located in the eastern part of Addis  
97 Ababa, the capital city of Ethiopia. Eka Kotebe General Hospital was established as an extension  
98 of Amanuel Mental Specialized Hospital until April 2020, when it became a stand-alone federal  
99 hospital. The hospital has a dedicated clinic for patients with epilepsy. There were about 2478  
100 epileptic patients who had regular follow-ups in a year at the outpatient department, and on  
101 average, 200 epilepsy patients have follow-ups at the hospital. Patients pay for the services they  
102 get from the hospital and for purchasing AEDs, except those who use CBHI (community-based  
103 health insurance). The hospital also gives psychiatric services at the outpatient level. In addition,  
104 the hospital has served as a dedicated inpatient COVID treatment center.

### 105 **Source population**

106 Adult epileptic patients who have been on treatment with one or more antiepileptic drugs and who  
107 had follow-ups at the outpatient units during the study period.

### 108 **Study population**

109 We selected adult epileptic patients who have been on treatment with one or more Antiepileptic  
110 drugs and who had follow-up at the outpatient units during the study period, fulfilling the inclusion  
111 criteria.

## 112 **Inclusion criteria**

113 Adult Epileptic Patients (age $\geq$ 18 years) who had a follow-up in the hospital for at least three  
114 months and received AEDs at the last visit were eligible for the study. Patients with general severe  
115 medical conditions and unable to communicate were excluded.

## 116 **Sample Size and Sampling Technique**

117 The sample size for the first objective was determined using a single population proportion formula  
118 considering the following assumptions ( $z=1.96$ ,  $d= 0.05$ , and  $P=65\%$ ) (20). Second, an attempt  
119 was made to calculate the sample size by considering the association of Drug availability and  
120 affordability with adherence using Open Epi version 2.3.1. Finally, the sample size we obtained  
121 from the first objective was the largest and was taken as our final sample. By considering a non-  
122 response rate of 10%, the final estimated sample size was 385.

123 Consecutive sampling was used to recruit samples for the study each day of the data collection  
124 process until the desired sample size was obtained.

## 125 **Data collection tool and procedures**

126 Data was collected using a structured questionnaire translated into a local language (Amharic) and  
127 pre-tested. Trained nurses interviewed volunteer participants face-to-face during their follow-up  
128 clinic visits. The data was collected after explaining the purpose of the study to the participants  
129 and earning informed written consent. The patient interview aimed to gather information related  
130 to sociodemographic, clinical factors, psychosocial factors, self-reported drug availability,  
131 affordability, and adherence. Their medical records were reviewed for the type of seizure and  
132 prescribed AEDs.

133 **Adherence** of epileptic patients to their AEDs was assessed using a self-reported questionnaire;  
134 in this study, a 3 items questionnaire focusing on medication use patterns of patients from their  
135 last visit to the current visit was used. Patients were asked 3 questions: “Did you forget to take your  
136 medicine since your last visit?” “In the past two weeks, were there any days you did not take your  
137 medicine?” and “Did you take all your medicine yesterday?” The response choices were yes/no,  
138 and a response “no” was rated as “1,” and a “yes” response as “0,” except for item 3. For item 3,  
139 a response “yes” was rated as “1” and “no” as “0”. The total score ranges from 0 to 3, with scores  
140 of  $\leq 1$ , 1 to  $< 3$ , and 3 reflecting low, medium, and high adherence, respectively. For data analysis,  
141 scores were categorized into two, scores  $< 3$  were assigned as non-adherent, and those who scored  
142 3 were assigned as adherent.

### 143 **Data quality control**

144 To ensure the data quality, a data collection tool was prepared after reviewing the literature related  
145 to the study. Data was collected by 4 BSC nurses who know about epilepsy and a supervisor. A  
146 thorough training was given by the principal investigator about the general objective of the study  
147 and the contents of the questionnaire. The questionnaire was pre-tested a week before the data  
148 collection started on 10 % of the sample size at Eka Kotebe General Hospital Outpatient units.  
149 After a thorough and deep review of inputs obtained during the pre-test, the final tool was  
150 developed with some modifications. The pre-tested patients were excluded from the analysis. Data  
151 collectors were supervised daily, and the supervisor and principal investigator checked the filled  
152 questionnaires daily.

### 153 **Data analysis**

154 The gathered quantitative data was cleaned, arranged, coded, and then analyzed through statistical  
155 packages for social sciences (SPSS) version 26.0 statistical Software. Categorical variables were

156 expressed by percentage and frequency, whereas numerical variables were present by median with  
157 Inter Quartile range (IQR).

158 The association between the independent variables and Adherence to AEDs was analyzed using a  
159 binary logistic regression model. Bivariate binary logistic regression was run at a 25% significance  
160 level to screen out potentially significant independent variables. A multivariable binary logistic  
161 regression model was run by including the significant independent variables from the bivariate  
162 binary logistic regression model. To measure the presence and strength of association between the  
163 independent variables and adherence to AEDs, adjusted odds ratio (AOR), P-value, and 95% CI  
164 for AOR were calculated separately for self-reported availability and affordability of AEDs. Since  
165 the ORs were not different, in the final model, the two variables were considered together, and  
166 variables with a P-value of  $\leq 0.05$  were considered significantly associated with adherence to  
167 AEDs.

## 168 **Operational definitions**

169 **Adherence:** In this study, AED adherence was measured using a self-report 3-item questionnaire  
170 focusing on medication use patterns of patients from their last visit to the current visit, which was  
171 developed by modifying the Morisky Medication Adherence Scale-8 (MMAS-8).

172 **Self-reported Drug Availability:** In this study, Drug availability was measured from the patient's  
173 perspective based on their ability to obtain their medication in the same facility where treatment  
174 was given, a nearby facility, or near their residence. Accordingly, Drug Availability was assigned  
175 as "**Available**" if patients were able to gain drugs in the same or nearby facility where they gain  
176 treatment or near their residency and "**Unavailable**" if they were not able to gain drugs neither in  
177 the same or nearby pharmacy/ facility where treatment was given nor nearby pharmacy/ facility to  
178 their residence.



179 **Self-reported Drug Affordability:** In this study, Drug affordability was assigned as  
180 “Affordable” if patients could pay for drugs with no difficulty or gain medications free and as  
181 “Unaffordable” if patients were paying for medications with difficulty.

182 **AED (Antiepileptic Drugs):** AEDs are the primary medications used to control seizures in  
183 epileptic patients. In our setup, the most prescribed antiepileptic drugs are phenobarbitone,  
184 phenytoin, and sometimes carbamazepine and sodium valproate. In this study, the number of  
185 AEDs used by patients were classified as monotherapy and ploy-therapy, implying patients who  
186 are using single and double or multiple antiepileptic drugs, respectively.

## 187 **Ethical consideration**

188 The research and ethical review board of the Addis Continental Institute of Public Health granted  
189 ethical clearance and approval of the study. Following the approval, Eka Kotebe General Hospital  
190 Institutional Review Board (IRB) obtained official permission. Before data collection, informed  
191 written consent was obtained from the study participants. Individuals were told that they had a  
192 right to withdraw from the study at any time, and this would not affect the service they got from  
193 the hospital. Confidentiality was ensured during the patient interviews and the review of charts.

## 194 **Results**

### 195 **Socio-Demographic characteristics**

196 A total of 357 participants participated in the study, with a response rate of 92.7%. From this,  
197 160(44.8%) of the respondents were 15-29 years old. More than half of the study participants  
198 (61.1%) were single and 184 (51.5%) were males. Regarding educational status, the majority of  
199 the study participants had primary and secondary school, 95 (26.6%) and 109(30.5%),  
200 respectively. Around two-thirds of the study participants were unemployed and, 191 (53.5%) were

201 living in Addis Ababa, and nearly a third were within the same sub-city. The median (IQR) family  
202 size of the participants was 4 (3, 5) (Table 1).

203 The majority of the respondents, 181(71.5%), had no financial support, and 118 (33.1%) thought  
204 they had someone around to help them often when they needed help. (Table 1).

205 **Table 1: Socio-Demographic Characteristics of Adult Epileptic Patients in Eka Kotebe**  
206 **General Hospital, Ethiopia, 2023 (n=357)**

| Variable                         | Category                   | Frequency | Percentage |
|----------------------------------|----------------------------|-----------|------------|
| <b>Family size (Median, IQR)</b> |                            |           | 4 (3,5)    |
| <b>Age(Year)</b>                 | 15-29                      | 160       | 44.8       |
|                                  | 30-44                      | 123       | 34.5       |
|                                  | >45                        | 74        | 20.7       |
| <b>Sex</b>                       | Female                     | 173       | 48.5       |
|                                  | Male                       | 184       | 51.5       |
| <b>Marital Status</b>            | Single                     | 218       | 61.1       |
|                                  | Married                    | 139       | 38.9       |
| <b>Educational Status</b>        | No formal education        | 80        | 22.4       |
|                                  | Primary education (1-8)    | 95        | 26.6       |
|                                  | Secondary education (9-12) | 109       | 30.5       |
|                                  | College and above          | 73        | 20.4       |

|                                 |                          |     |      |
|---------------------------------|--------------------------|-----|------|
| <b>Usual place of residence</b> | Within the same sub-city | 109 | 30.5 |
|                                 | Addis Ababa              | 191 | 53.5 |
|                                 | Outside Addis Ababa      | 57  | 16   |
| <b>Employment Status</b>        | Gainfully Employed       | 130 | 36.4 |
|                                 | Unemployed               | 227 | 63.6 |
| <b>Social Support</b>           | Not often                | 87  | 24.4 |
|                                 | Sometimes                | 152 | 42.6 |
|                                 | Often                    | 118 | 33.1 |
| <b>Financial support</b>        | No                       | 181 | 71.5 |
|                                 | Yes                      | 72  | 28.5 |

207

## 208 **Clinical factors for antiepileptic drug adherence**

209 Among the study participants, the majority of the patients, 279 (78.2%), were diagnosed with a  
 210 Generalized type of seizure, and more than half, 227(63.6%) of the participants were on  
 211 monotherapy. The median (IQR) age for the onset of the illness of the participants was 17(10, 24)  
 212 years, and about slightly two-thirds, 223(62.5%), of the participants had a duration of illness of  
 213 greater than/equal to 11 years. While co-morbidity was found in less than a fifth of the participants  
 214 and a small number, 17(4.8%) of the participants had an adverse effect that prompted them to stop  
 215 taking medication since their last visit (Table 2).

216

217

218 **Table 2: Clinical factors for antiepileptic drug adherence among adult Epileptic patients at**  
 219 **Eka Kotebe General Hospital, Ethiopia, 2023 (n=357)**

| <b>Variable</b>                                                                                      | <b>Category</b> | <b>Frequency</b> | <b>Percentage</b> |
|------------------------------------------------------------------------------------------------------|-----------------|------------------|-------------------|
| <b>Age of onset of Epilepsy (Year) (Median, IQR)</b>                                                 |                 |                  | 17(10,24)         |
| <b>Duration of illness (in Years)</b>                                                                | <5 years        | 48               | 13.4              |
|                                                                                                      | 6-10 years      | 82               | 23                |
|                                                                                                      | >11 years       | 223              | 62.5              |
| <b>Types of Seizure</b>                                                                              | Generalized     | 279              | 78.2              |
|                                                                                                      | Partial         | 66               | 18.5              |
|                                                                                                      | Unclassified    | 12               | 3.4               |
| <b>Number of AEDs</b>                                                                                | Monotherapy     | 227              | 63.6              |
|                                                                                                      | Polytherapy     | 130              | 36.4              |
| <b>History of Adverse effects of AEDs that prompt to stop taking medication</b>                      | No              | 283              | 79.3              |
|                                                                                                      | Yes             | 74               | 20.7              |
| <b>History of Adverse effects of AEDs that prompt to stop taking medication since the last visit</b> | No              | 340              | 95.2              |
|                                                                                                      | Yes             | 17               | 4.8               |

|                    |     |     |      |
|--------------------|-----|-----|------|
| <b>Comorbidity</b> | No  | 308 | 86.3 |
|                    | Yes | 49  | 13.7 |

220

221 **Prevalence of adherence to AEDs and Self-reported drug availability**  
 222 **and affordability among adult Epileptic patients.**

223 The prevalence of AED adherence was 55.2% with 95% CI (50.1%; 60.2%). In this study, self-  
 224 reported availability and affordability of AEDs were found to be 80.1% and 53.2% respectively  
 225 (Table 3).

226 **Table 3: Prevalence of adherence to AEDs and Self-reported drug availability and**  
 227 **affordability among adult Epileptic patients at Eka Kotebe General Hospital, Ethiopia, 2023**  
 228 **(n=357)**

| <b>Variable</b>                            | <b>Category</b> | <b>Frequency</b> | <b>Percentage</b> |
|--------------------------------------------|-----------------|------------------|-------------------|
| <b>Adherence to AEDs</b>                   | Non-Adherent    | 160              | 44.8              |
|                                            | Adherent        | 197              | 55.2              |
| <b>Self-reported Availability of AEDs</b>  | Unavailable     | 71               | 19.9              |
|                                            | Available       | 286              | 80.1              |
| <b>Self-reported Affordability of AEDs</b> | Unaffordable    | 167              | 46.8              |
|                                            | Affordable      | 190              | 53.2              |

229

230

231 The unavailability of the medications at hand 36.3% and forgetfulness to take medicine 35.6%,  
232 were the most common reasons for medication nonadherence, followed by drug unaffordability  
233 25%, and travel outside the home 13.1% was the least reasons for medication non-adherence (Fig  
234 1).

235 **Fig 1. Reasons for AEDs non-adherence at Eka Kotebe General Hospital, Ethiopia, 2023 (n=**  
236 **357)**

### 237 **Association of Self-reported drug availability and affordability with** 238 **anti-epileptic drug adherence among people with epilepsy.**

239 In the Bivariate binary logistic regression, Educational status, Number of AEDs, and self-reported  
240 affordability of AEDs were significantly associated with adherence to AEDs. However, on the  
241 multivariable binary logistic regression model, after adjusting for the covariates, Patients who  
242 finished secondary school, were educated up to college level and above, Number of AEDs, and  
243 self-reported Availability of AEDs were found to have a statistically significant relationship with  
244 adherence to AEDs at 5% level of significance.

245 Accordingly, after adjusting for other covariates, the odds of being adherent to AEDs among those  
246 with secondary education were 2.2times higher as compared to those with no formal education  
247 (**AOR=2.24, 95% CI=1.08, 4.61, p-value=0.030**). Similarly, the odds of adherent to AEDs were  
248 2.7 times higher for those educated up to college level and above than those with no formal  
249 education (**AOR= 2.71, 95% CI= 1.14, 6.46, p-value=0.025**). Regarding self-reported availability  
250 of AEDs, the odds of being adherent to AEDs were 2times higher among those who reported the  
251 medications available as compared with those who reported unavailable (**AOR=2.04,95%**  
252 **CI=1.03,4.03, p-value=0.041**). On the other hand, the odds of being adherent to AEDs were 45.5%  
253 less for those on polytherapy than those on monotherapy (**AOR= 0.55, 95% CI= 0.31,0.95, p-**

254 **value=0.031**). In bivariate logistic regression analysis, self-reported affordability of AEDs was  
 255 associated with AEDs adherence (COR=1.59, CI=1.04, 2.42, P-Value=0.031); however, when  
 256 adjusted for other covariates in the multivariable logistic regression, no significant association was  
 257 observed (p=0.730) (Table 4).

258 **Table 4: Bivariate and Multivariate analysis of variables associated with AED adherence**  
 259 **(n=357)**

| Variables          | Category                | Adherence to AEDs |              | COR (95% CI)    | AOR (95% CI)    | P-Value |
|--------------------|-------------------------|-------------------|--------------|-----------------|-----------------|---------|
|                    |                         | Non-adherent (n)  | Adherent (n) |                 |                 |         |
| Age (years)        | 15-29                   | 72                | 88           | 1               | 1               |         |
|                    | 30-44                   | 55                | 68           | 1.01(0.63-1.62) | 1.08(0.59-1.97) | 0.808   |
|                    | >45                     | 33                | 41           | 1.02(0.59-1.77) | 0.95(0.45-2.00) | 0.884   |
| Sex                | Female                  | 77                | 96           | 1               | 1               |         |
|                    | Male                    | 83                | 101          | 0.98(0.64-1.48) | 0.89(0.53-1.50) | 0.658   |
| Educational Status | No formal education     | 43                | 37           | 1               | 1               |         |
|                    | Primary education (1-8) | 50                | 45           | 1.05(0.58-1.90) | 1.12(0.54-2.33) | 0.767   |

|                                            |                            |     |     |                         |                        |               |
|--------------------------------------------|----------------------------|-----|-----|-------------------------|------------------------|---------------|
|                                            | Secondary education (9-12) | 41  | 68  | <b>1.93(1.07-3.46)</b>  | <b>2.24(1.08-4.61)</b> | <b>0.030*</b> |
|                                            | College and above          | 26  | 47  | <b>2.10(1.10-4.03)</b>  | <b>2.71(1.14-6.46)</b> | <b>0.025*</b> |
| <b>Number of Antiepileptic drugs</b>       | Monotherapy                | 89  | 138 | 1                       | 1                      |               |
|                                            | Polytherapy                | 71  | 59  | <b>0.54(0.35-0.83)</b>  | <b>0.55(0.31-0.95)</b> | <b>0.031*</b> |
| <b>Comorbidity</b>                         | No                         | 137 | 171 | 1                       | 1                      |               |
|                                            | Yes                        | 23  | 26  | 0.91(0.50-1.66)         | 0.79(0.34-1.82)        | 0.579         |
| <b>Self-reported Availability of AEDs</b>  | Unavailable                | 36  | 35  | 1                       | 1                      |               |
|                                            | Available                  | 124 | 162 | <b>1.34 (0.80-2.26)</b> | <b>2.04(1.03-4.03)</b> | <b>0.041*</b> |
| <b>Self-reported Affordability of AEDs</b> | Unaffordable               | 85  | 82  | 1                       | 1                      |               |
|                                            | Affordable                 | 75  | 115 | 1.59(1.04-2.42)         | 1.11(0.63-1.96)        | 0.730         |
| <b>Financial Support</b>                   | No                         | 89  | 92  | 1                       | 1                      |               |
|                                            | Yes                        | 34  | 38  | 1.08(0.63-1.87)         | 0.93(0.52-1.66)        | 0.799         |

260 \* Statistically Significant at P<0.05

261



## 262 **Discussion**

263 Findings of adherence in this study showed that less than two-thirds (55.2%; 95% CI (50.1%-  
264 60.2%)) of the study participants were adherent to antiepileptic drugs. Globally, the adherence rate  
265 ranges between 33 and 99 % (6,8,10,12,13).

266 The prevalence of adherence to antiepileptic drugs in this study was in line with a cross-sectional  
267 study conducted in Addis Ababa (52.4%) (21), Jimma (58.5 %) (9), and Nigeria (55.5 %) (22).  
268 However, it was lower than the study done in Gondar, Ethiopia (61.5%)(23), Southwestern  
269 Ethiopia (63.5%)(24), and India (72.3%) (25). The probable reason for these discrepancies could  
270 be the differences in the methodology used for assessing adherence rate and the study design. For  
271 example, a prospective observational study was employed in the study from southwestern  
272 Ethiopia, and adherence was assessed by the Hill–Bone compliance to the high blood pressure  
273 therapy scale (24), but the current study employed a cross-sectional study design, and adherence  
274 was assessed using self-report questionnaire modified from MMAS 8. The other reason could be  
275 due to the socio-demographic characteristics of the study participants as well as the study area.

276 On the other hand, the findings of this study were higher than the studies done in Brazil and  
277 Nigeria, which were (33.8%) (26) and (31.6%) (13), respectively, and this difference was probably  
278 due to the difference in AEDs multidrug treatment. For instance, 71.1% of people with epilepsy in  
279 Brazil and 85% in Nigeria were on multiple AED treatment, while in the current study, only 36.4%  
280 of people with epilepsy were in poly-AED treatment.

281 The most common reasons for missing doses in this study were the unavailability of the  
282 medications at hand (36.3%) followed by forgetfulness to take medicine (35.6%), which is  
283 supported by the findings of studies in Amanuel Mental Specialized Hospital, Ethiopia (27), Jimma  
284 Ethiopia (24) and Nigeria (22).

285 In this study, factors found to have a significant association with adherence to AEDs were higher  
286 educational status, self-reported availability of AEDs, and being on polytherapy. This study  
287 revealed the odds of being adherent to AEDs were 2.7 times higher for those who were educated  
288 up to college level and above than those with no formal education. This result aligns with the study  
289 conducted in India (28). This might be due to patients who are more educated might question their  
290 health care providers about their disease and its medications, might be more aware of the disease  
291 progression and follow the prescription and instructions as told Whereas, those who are less  
292 educated in our setting might prefer other alternative traditional practices at home than proper  
293 medication follow up.

294 Besides, Patients taking combination drugs were less likely to Adhere. Polytherapy increases the  
295 potential for drug-drug interactions, results in failure to evaluate the individual drugs may affect  
296 compliance and is associated with a higher cost of medication and the necessity for therapeutic  
297 drug monitoring (29). Our study revealed the odds of being adherent to AEDs were 45.5% less for  
298 those on polytherapy as compared with those who were on monotherapy. Similar studies found a  
299 negative association between the complexity of medication and patient adherence (22,28).

300 Regarding self-reported availability of AEDs, the odds of being adherent to AEDs were two times  
301 higher among those who reported the medications available as compared with those who reported  
302 unavailable. This finding was supported by the study from Jimma, Ethiopia (24), and India (28).

303 In bivariate logistic regression analysis, self-reported affordability of AEDs was associated with  
304 AED adherence. This finding was supported by the study from South Western Ethiopia (30). The  
305 possible justification was that patients who got their medication out of pocket would sometimes  
306 cease to purchase their medications, and those who got free will continue their medications in  
307 whatever circumstances.

308 By contrast, the patient's adherence to their medication did not show a significant association with  
309 age and gender. This result is in line with the findings in Gondar, Ethiopia (23), Nigeria (22), and  
310 India (28).

311 This study has a few limitations. First, it was a cross-sectional study with no prospective follow-  
312 up period. As a result, it may be subjected to recall bias. Second, a self-reported measure of  
313 adherence, which is prone to social desirability bias, was used to measure adherence. Third, it was  
314 conducted in a single setting, which makes it difficult to generalize. Therefore, a large-scale  
315 nationwide study is highly recommended.

## 316 **Conclusion and Recommendation**

317 In conclusion, overall, only about half of the patients adhered to Antiepileptic drugs at Eka Kotebe  
318 General Hospital. The self-reported availability of AEDs was significantly associated with  
319 adherence to antiepileptic drugs. Improving access to AEDs is critical to improving adherence and  
320 management of epilepsy.

## 321 **Acknowledgments**

322 We thank the patients for their consent to participate in this study and their patience during the  
323 interview. We also appreciate the staff of Eka Kotebe General Hospital for their cooperation and  
324 support throughout the data collection process.

## 325 **Abbreviations**

326 AEDs            Anti-Epileptic Drugs

327 AOR            Adjusted Odds Ratio

|     |        |                                         |
|-----|--------|-----------------------------------------|
| 328 | CBHI   | Community-Based Health Insurance        |
| 329 | CI     | Confidence Interval                     |
| 330 | COR    | Crudes Odds Ratio                       |
| 331 | IQR    | Inter Quartile Range                    |
| 332 | IRB    | Institutional Review Board              |
| 333 | MMAS-8 | Morisky Medication Adherence Scale-8    |
| 334 | OR     | Odds ratio                              |
| 335 | SPSS   | Statistical Package for Social Sciences |

## 336 **Reference**

- 337 1. Cramer JA, Roy A, Burrell A, Fairchild CJ, Fuldeore MJ, Ollendorf DA, et al. Medication  
338 Compliance and Persistence: Terminology and Definitions. *Value in Health*. 2008  
339 Jan;11(1):44–7.
- 340 2. Gottlieb H. Medication nonadherence: finding solutions to a costly medical problem CME.  
341 *Drug Benefit Trends* [Internet]. (12(6):57-62, 2000). Available from:  
342 <http://www.medscape.com/SCP/DBT/2000/v12.n06/d1206.01.gott/d1206.01.gott-01.html>
- 343 3. Organization WH. Neurological disorders: public health challenges. *World Health*  
344 *Organization*; 2006.
- 345 4. Kwan P, Brodie MJ. Early Identification of Refractory Epilepsy. *N Engl J Med*. 2000 Feb  
346 3;342(5):314–9.

- 347 5. Scott RA, Lhatoo SD, Sander JW. The treatment of epilepsy in developing countries: where do  
348 we go from here? *Bulletin of the World Health Organization*. 2001;79(4):344–51.
- 349 6. Hovinga CA, Asato MR, Manjunath R, Wheless JW, Phelps SJ, Sheth RD, et al. Association of  
350 non-adherence to antiepileptic drugs and seizures, quality of life, and productivity: Survey of  
351 patients with epilepsy and physicians. *Epilepsy & Behavior*. 2008 Aug;13(2):316–22.
- 352 7. Jones RM, Butler JA, Thomas VA, Peveler RC, Prevett M. Adherence to treatment in patients  
353 with epilepsy: Associations with seizure control and illness beliefs. *Seizure*. 2006  
354 Oct;15(7):504–8.
- 355 8. Teferra A, Alemayehu W. Patient non-compliance with drug regimens for chronic diseases in  
356 northwest Ethiopia. *Ethiopian Journal of Health Development*. 2001;15(3):185–92.
- 357 9. Getachew H, Dekema N, Awol S, Abdi A, Mohammed M. Medication adherence in epilepsy  
358 and potential risk factors associated with non adherence in tertiary care teaching hospital in  
359 southwest Ethiopia. *Gaziantep Med J*. 2014;20(1):59.
- 360 10. Sebastian J, Adepur R, Keshava BS, Harsha S. Assessment of antiepileptic drugs usage in  
361 a South Indian tertiary care teaching hospital. *Neurology Asia*. 2013;18(2).
- 362 11. Sweileh WM, Ihabesheh MS, Jarar IS, Taha ASA, Sawalha AF, Zyoud SH, et al. Self-  
363 reported medication adherence and treatment satisfaction in patients with epilepsy. *Epilepsy &*  
364 *Behavior*. 2011 Jul;21(3):301–5.
- 365 12. Liu J, Liu Z, Ding H, Yang X. Adherence to treatment and influencing factors in a sample  
366 of Chinese epilepsy patients. *Epileptic Disorders*. 2013 Sep;15(3):289–94.

- 367 13. Johnbull OS, Farounbi B, Adeleye AO, Ogunrin O, Uche AP. Evaluation of Factors  
368 Influencing Medication Adherence in Patients with Epilepsy in Rural Communities of Kaduna  
369 State, Nigeria. *NM*. 2011;02(04):299–305.
- 370 14. Egenasi C, Steinberg W, Raubenheimer J. Beliefs about medication, medication adherence  
371 and seizure control among adult epilepsy patients in Kimberley, South Africa. *South African  
372 Family Practice*. 2015 Sep 3;57(5):326–32.
- 373 15. Getnet A, Woldeyohannes SM, Bekana L, Mekonen T, Fekadu W, Menberu M, et al.  
374 Antiepileptic Drug Nonadherence and Its Predictors among People with Epilepsy. *Behavioural  
375 Neurology*. 2016;2016:1–6.
- 376 16. Cameron A, Bansal A, Dua T, Hill SR, Moshe SL, Mantel-Teeuwisse AK, et al. Mapping  
377 the availability, price, and affordability of antiepileptic drugs in 46 countries. *Epilepsia*. 2012  
378 Jun;53(6):962–9.
- 379 17. Mac TL, Le VT, Vu AN, Preux P, Ratsimbazafy V. AEDs Availability and Professional  
380 Practices in Delivery Outlets in a City Center in Southern Vietnam. *Epilepsia*. 2006  
381 Feb;47(2):330–4.
- 382 18. Chomba EN, Kansembe H, Mbewe E, Ndubani P, Birbeck GL, Haworth A, et al. The  
383 Current Availability of Antiepileptic Drugs in Zambia: Implications for the ILAE/WHO “Out  
384 of the Shadows” Campaign. *The American Journal of Tropical Medicine and Hygiene*. 2010  
385 Sep 1;83(3):571–4.

- 386 19. YANGATIMBI E. Problem of accessibility to antiepileptic drugs for patients suffering  
387 from epilepsy in Bangui. Central African Republic. African & Middle East Epilepsy Journal.  
388 2020;9(6).
- 389 20. Berhe T, Mulatu HA. Anti-epileptic drug utilization pattern and control of seizure among  
390 patients with epilepsy at two tertiary hospitals in Addis Ababa, Ethiopia. Vol. 1, Received: 16  
391 December 2021 Accepted: 31 December 2021 Published: 24 January 2022. MJH; 2021.
- 392 21. Molla S, Demissie H, Ayele BA, Tsehayneh F, Ali S, Zenebe G. Factors associated with  
393 antiepileptic drug adherence in epileptic patients at a tertiary care center in Ethiopia: A cross  
394 sectional study. African Journal of Neurological Sciences. 2021;40(2):3–10.
- 395 22. Ejeliogu EU, Courage A. Prevalence and factors associated with non-adherence to  
396 antiepileptic drugs among children with epilepsy in Jos, Nigeria. Nig J Paed. 2020 Aug  
397 6;47(3):240–5.
- 398 23. Tilahun M, Habte N, Mekonnen K, Srahbzu M, Ayelegne D. Nonadherence to  
399 Antiepileptic Medications and Its Determinants among Epileptic Patients at the University of  
400 Gondar Referral Hospital, Gondar, Ethiopia, 2019: An Institutional-Based Cross-Sectional  
401 Study. de Carvalho M, editor. Neurology Research International. 2020 Oct 28;2020:1–9.
- 402 24. Bayane YB, Senbeta BS. Pattern of anti-epileptic medications nonadherence and  
403 associated factors at ambulatory clinic of Jimma Medical Center, Southwestern Ethiopia: A  
404 prospective observational study. SAGE Open Medicine. 2023 Jan;11:205031212311608.

- 405 25. Gurumurthy R, Chanda K, Sarma G. An evaluation of factors affecting adherence to  
406 antiepileptic drugs in patients with epilepsy: a cross-sectional study. *smedj*. 2017 Feb;58(2):98–  
407 102.
- 408 26. Ferrari CMM, de Sousa RMC, Castro LHM. Factors associated with treatment non-  
409 adherence in patients with epilepsy in Brazil. *Seizure*. 2013 Jun;22(5):384–9.
- 410 27. Shumet S, Wondie M, Ayano G, Asfaw H, Kassew T, Mesafint G. Antiepileptic Drug  
411 Adherence and Its Associated Factors among Epilepsy Patients on Follow-ups at Amanuel  
412 Mental Specialized Hospital, Ethiopia. *Ethiopian Journal of Health Sciences*. 2022;32(5):913–  
413 22.
- 414 28. Govil N, Chahal S, Gupta N, Kaloti AS, Nadda A, Singh P. Factors Associated with Poor  
415 Antiepileptic Drugs Adherence in Below Poverty Line Persons with Epilepsy: A Cross-  
416 Sectional Study. *JNRP*. 2021 Jan 29;12:95–101.
- 417 29. ArulKumaran KSG, Palanisamy S, Rajasekaran A. A study on drug use evaluation of anti-  
418 epileptics at a multispecialty tertiary care teaching hospital. *Int J Pharm Tech Res*.  
419 2009;1(4):1541–7.
- 420 30. Bereda G, Bereda G. Determination of the Factors Leading To Non Adherence with Anti-  
421 Epileptic Medication in Psychiatric Ambulatory Follow up Patients of Mettu Karl Referral  
422 Hospital, South Western, Ethiopia: A Prospective Cross Sectional Study. *South Western,  
423 Ethiopia: A Prospective Cross Sectional Study J Basic ClinPharma*. 2021;12(4):51–6.
- 424  
425



## 426 **Supporting Information**

427 **S1 File. English Version of Questionnaires**

428 **S2 File. Amharic Version of Questionnaires**

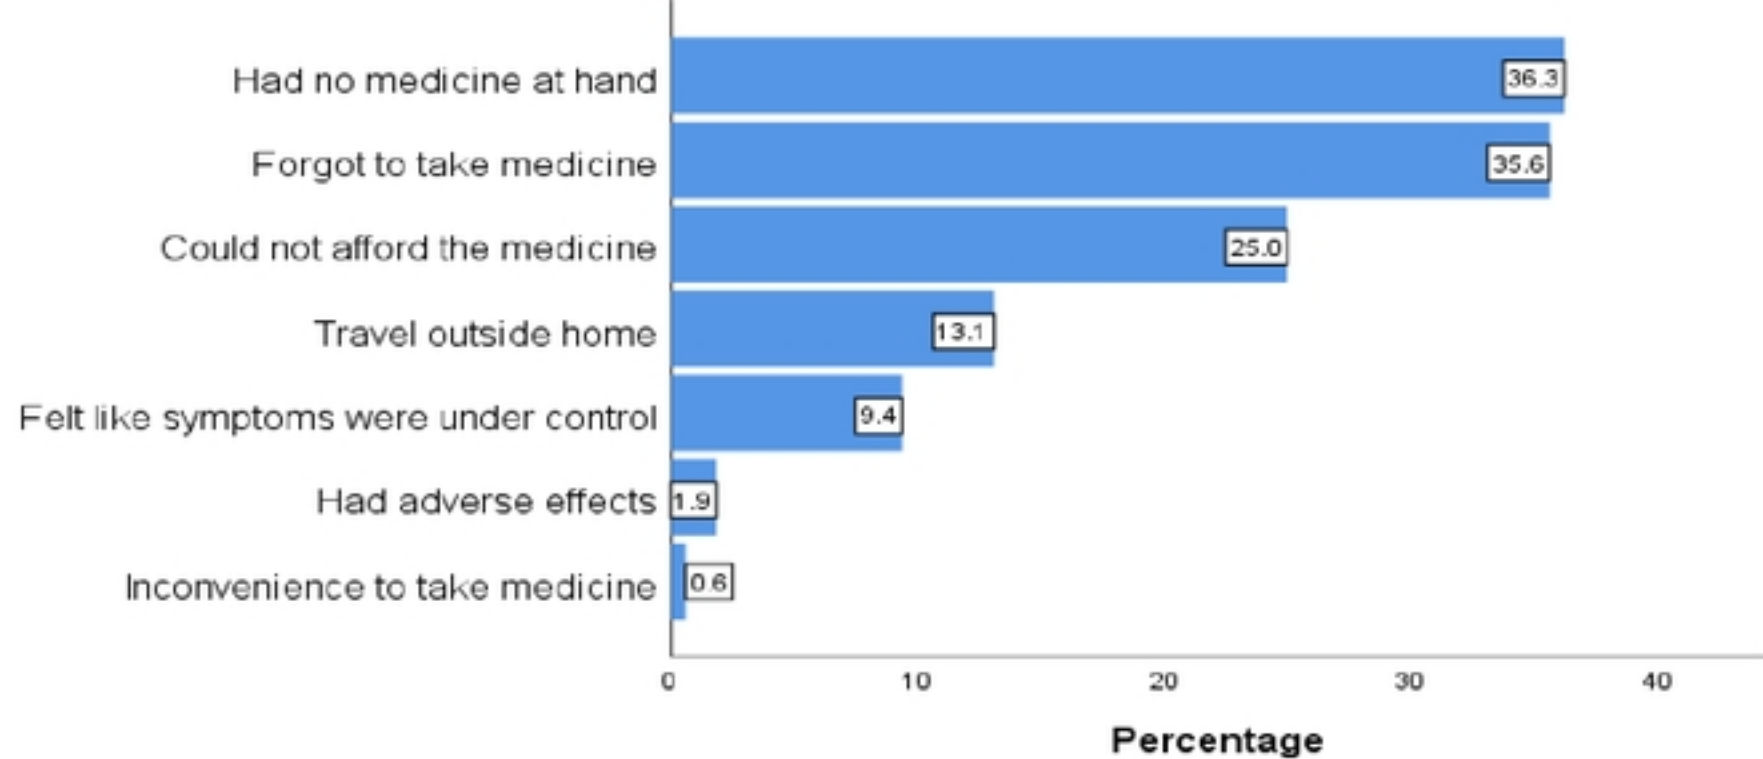

**Fig 1. Reasons for AEDs non-adherence at Eka Kotebe General Hospital, Ethiopia, 2023 (n= 357)**

Fig 1
